# Supplementary material for: A DArT marker-based linkage map for wild potato Solanum bulbocastanum facilitates structural comparisons between SolanumA and B genomes
Source: Springer Nature journal article supplement (doi:10.1186/s12863-014-0123-6), 2014-11-17

chr01 G15LG1 ch01 chr02 G15LG2 ch02 chr03 G15LG3 ch03 chr04 G15LG4 ch04 chr05 G15LG5 ch05 chr06 G15LG6 ch06

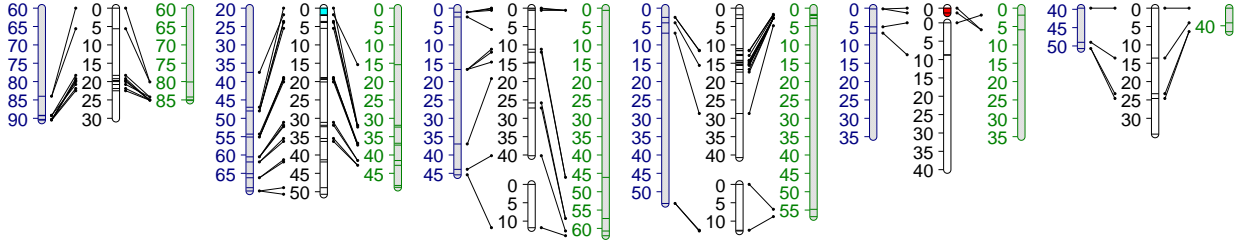

chr07 G15LG7 ch07 chr08 G15LG8 ch08 chr09 G15LG9 ch09 chr10 G15LG10 ch10 chr11 G15LG11 ch11 chr12 G15LG12 ch12

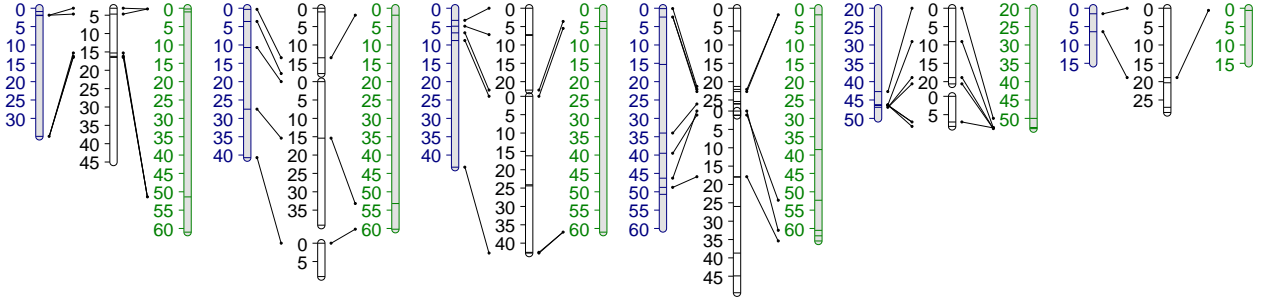

Supplement: 12863_2014_123_MOESM5_ESM.pdf [file 12863_2014_123_MOESM5_ESM.pdf]
